# Supplementary material for: Integration of human adipocyte chromosomal interactions with adipose gene expression prioritizes obesity-related genes from GWAS
Source: PubMed Central journal article supplement (PMC5904163; doi:10.1038/s41467-018-03554-9), 2018-04-17
Supplement: 41467_2018_3554_MOESM1_ESM.pdf [file 41467_2018_3554_MOESM1_ESM.pdf]

Integration of human adipocyte chromosomal interactions with adipose gene expression  
prioritizes obesity-related genes from GWAS

Pan et al.

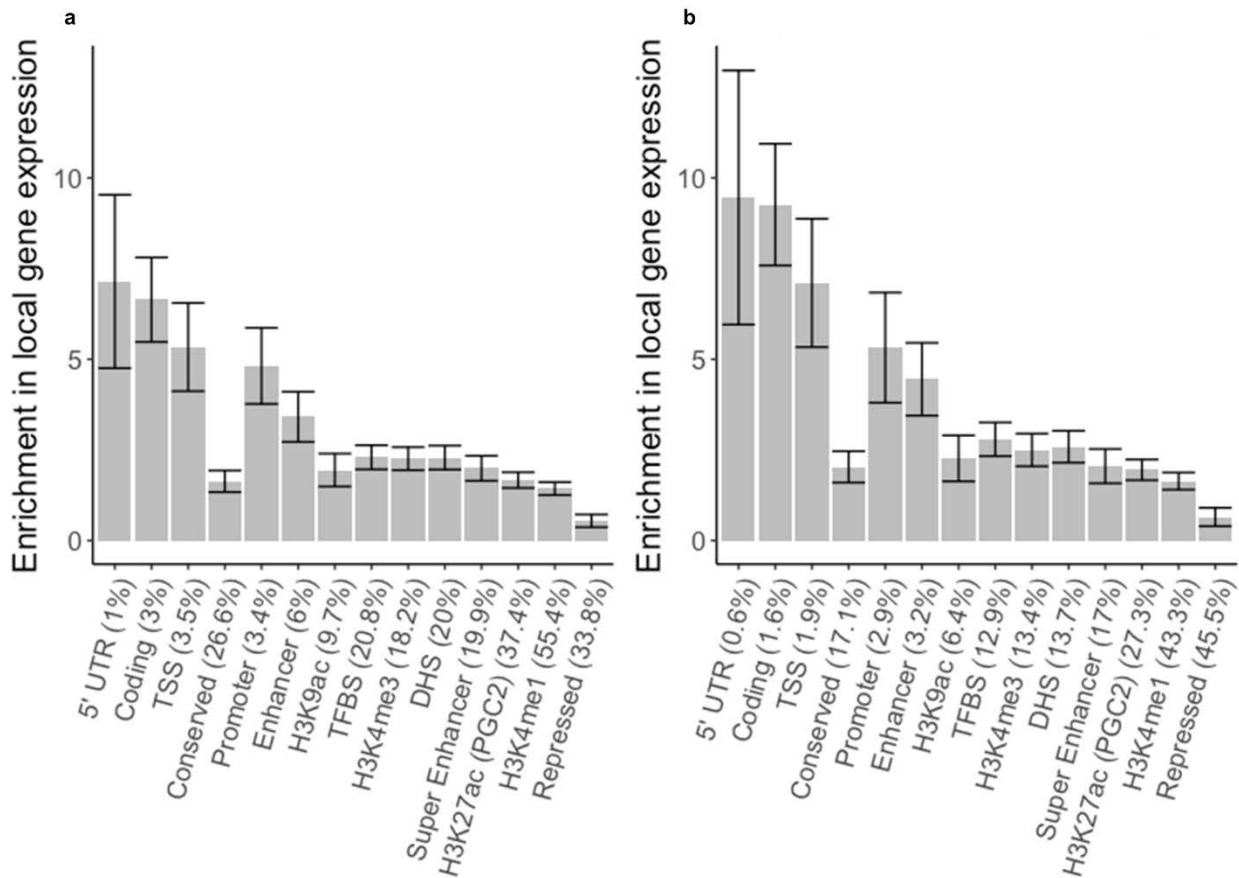

**Supplementary Figure 1. Modification to LD Score regression software does not show significant changes when compared with the data obtained using the published version.**

Enrichments in local gene expression with error bars for different categories using the LD score regression analysis. For the horizontal axis labels, the value in parentheses shows the percentage of SNPs contained within the respective annotation category that contributed to the enrichment calculation (for the full data on all 52 baseline annotation categories, see Supplementary Table 3-4). Error bars represent jackknife standard errors around the estimates of enrichment. (a) Enrichment in local gene expression for the modified LD Score regression software. (b) Enrichment in local gene expression for the original, unmodified LD Score regression software.

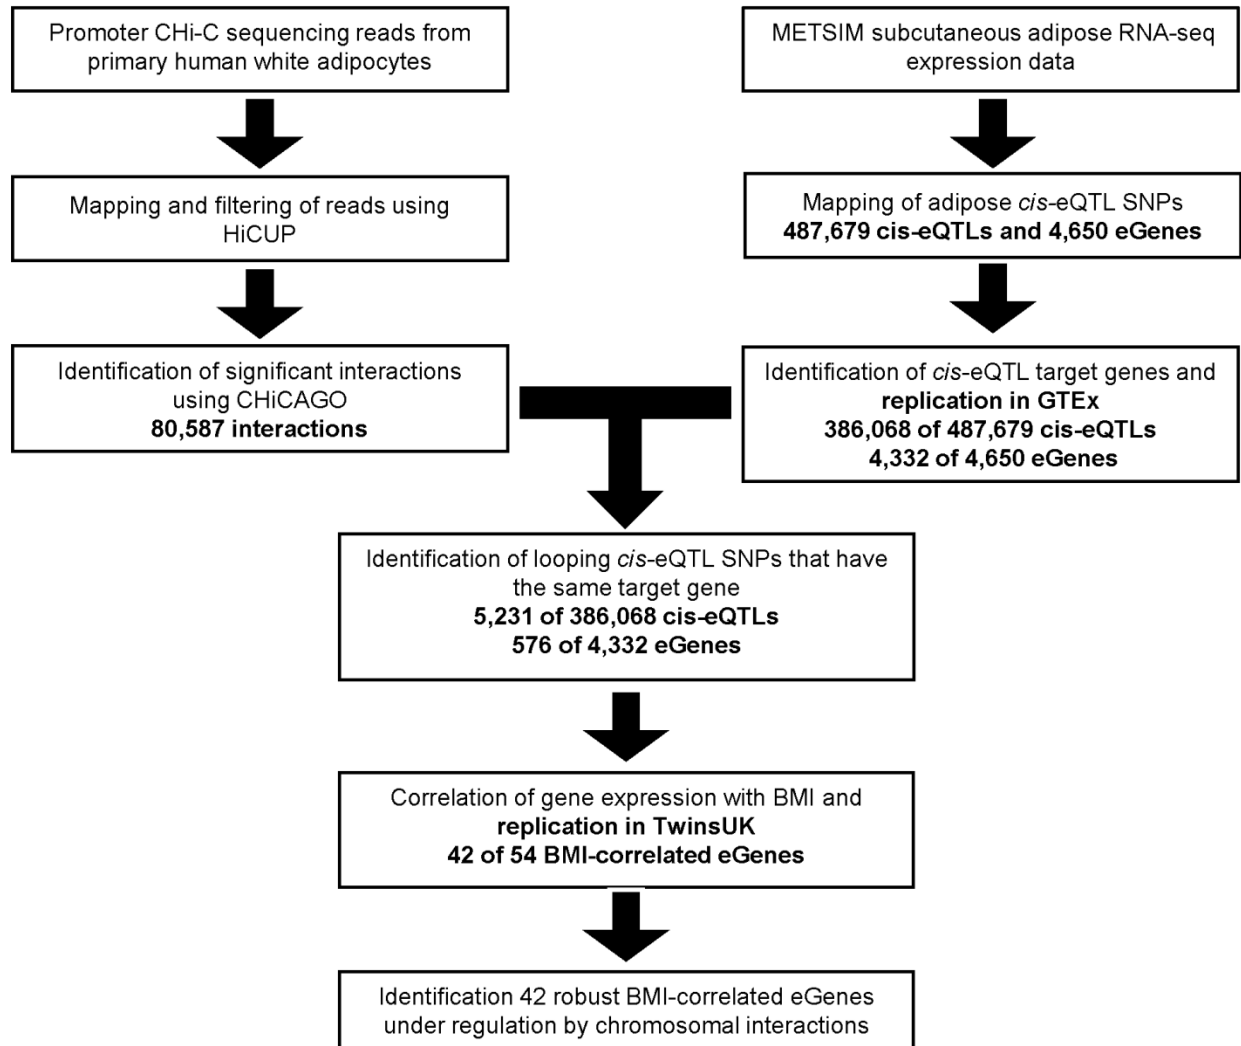

**Supplementary Figure 2. Overview of the study design targeted to identify causal and reactive BMI-correlated genes.**

Flow chart showing the data processing and analysis pipeline of the promoter Capture Hi-C in primary human white adipocytes (HWA) (the left side); adipose RNA-sequencing followed by *cis*-eQTL mapping (the right side); and the integration of these genomics data (in the middle) to identify eGenes correlated with BMI.

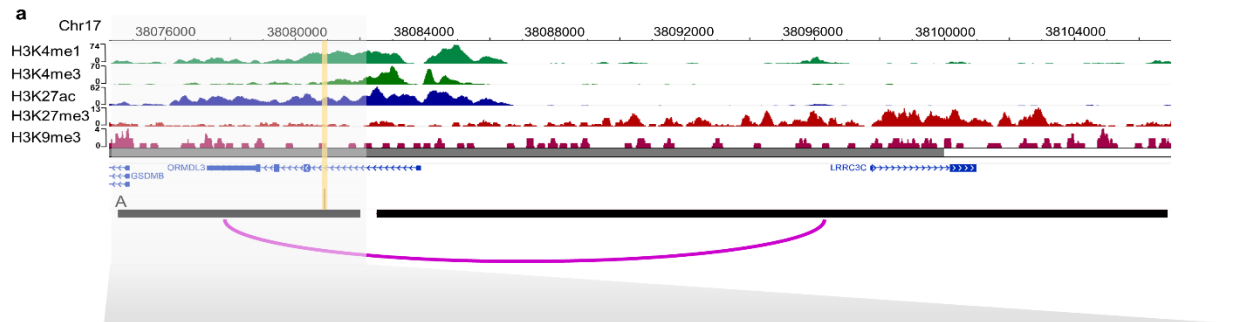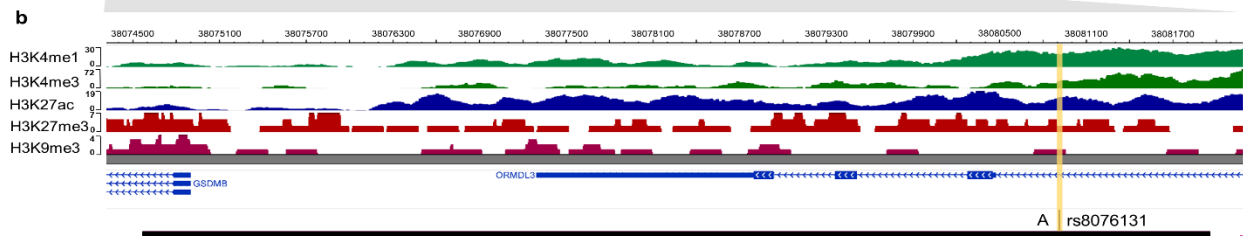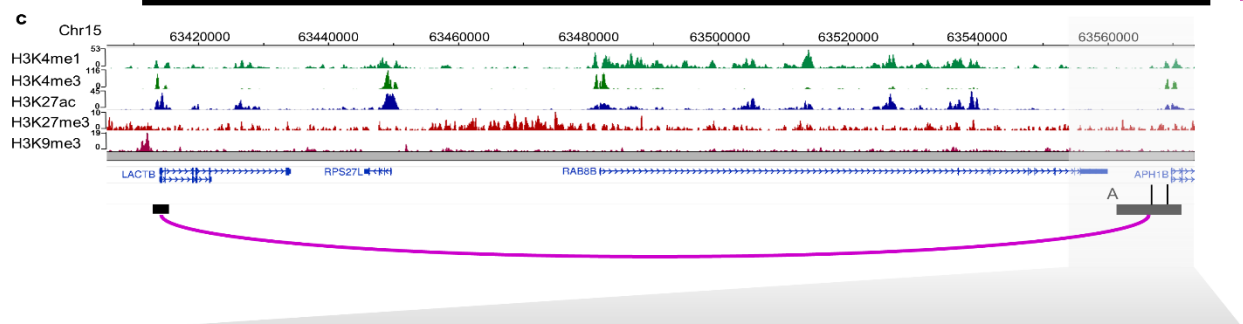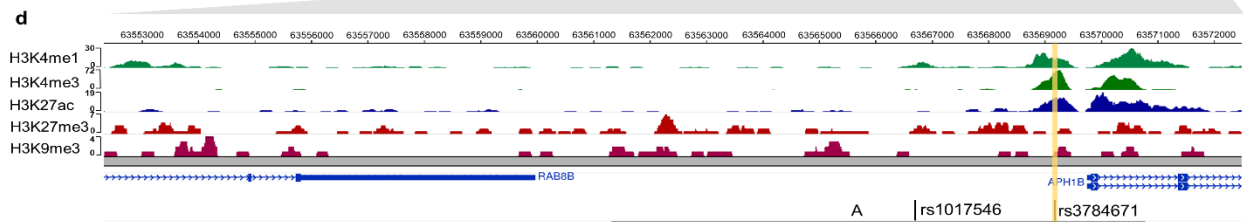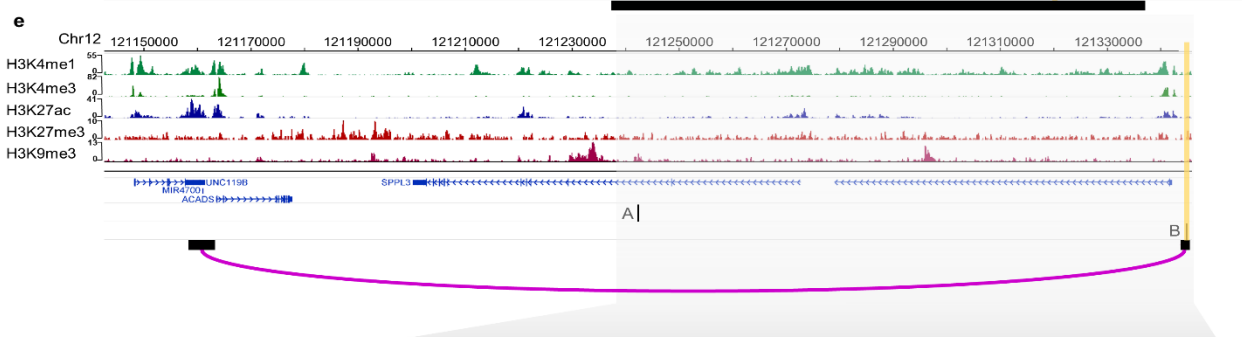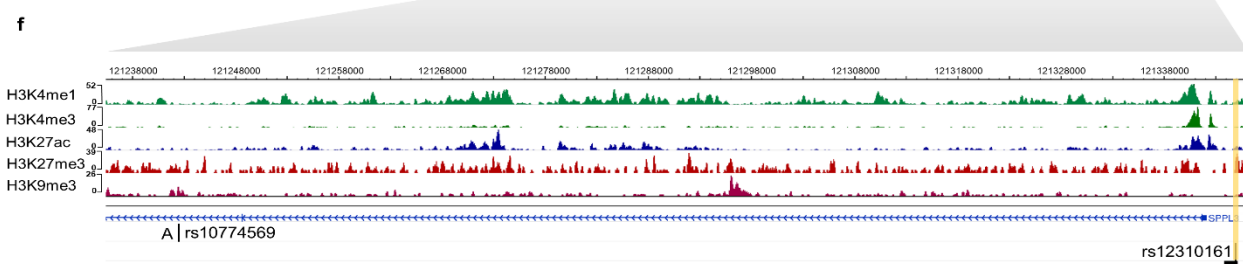

**Supplementary Figure 3. Promoter Capture Hi-C enables refinement of the GWAS loci that colocalizes with *cis*-eQTLs interacting with the target gene promoter of *ORMDL3*, *LACTB*, and *ACADS*.**

Genomic landscape of the lipid GWAS locus, *ORMDL3* (panels a, b), metabolite GWAS locus, *LACTB* (panels c, d), and metabolite GWAS locus, *ACADS* (panels e, f), modified from the WashU Genome Browser to show the histone mark calls from ChIP-seq data; gene transcripts; promoter and eQTL *HindIII* fragments that interact in primary human white adipocytes (HWA); and GWAS SNP (A, the rs number indicated in the magnified box) or their LD proxies if applicable (B,  $r^2 > 0.80$ ) located in the interacting *HindIII* fragment. The vertical yellow band highlights the significantly influential variant (the rs number is indicated in the magnified box).

(a) Genomic landscape containing *ORMDL3* and the interacting lipid GWAS SNP. (b) Magnification of the boxed region in (a). (c) Genomic landscape containing *LACTB* and the interacting metabolite GWAS SNPs. (d) Magnification of the boxed region in (c). (e) Genomic landscape containing *ACADS* and the interacting *cis*-eQTLs and corresponding metabolite GWAS SNP. (f) Magnification of the boxed region in (e).

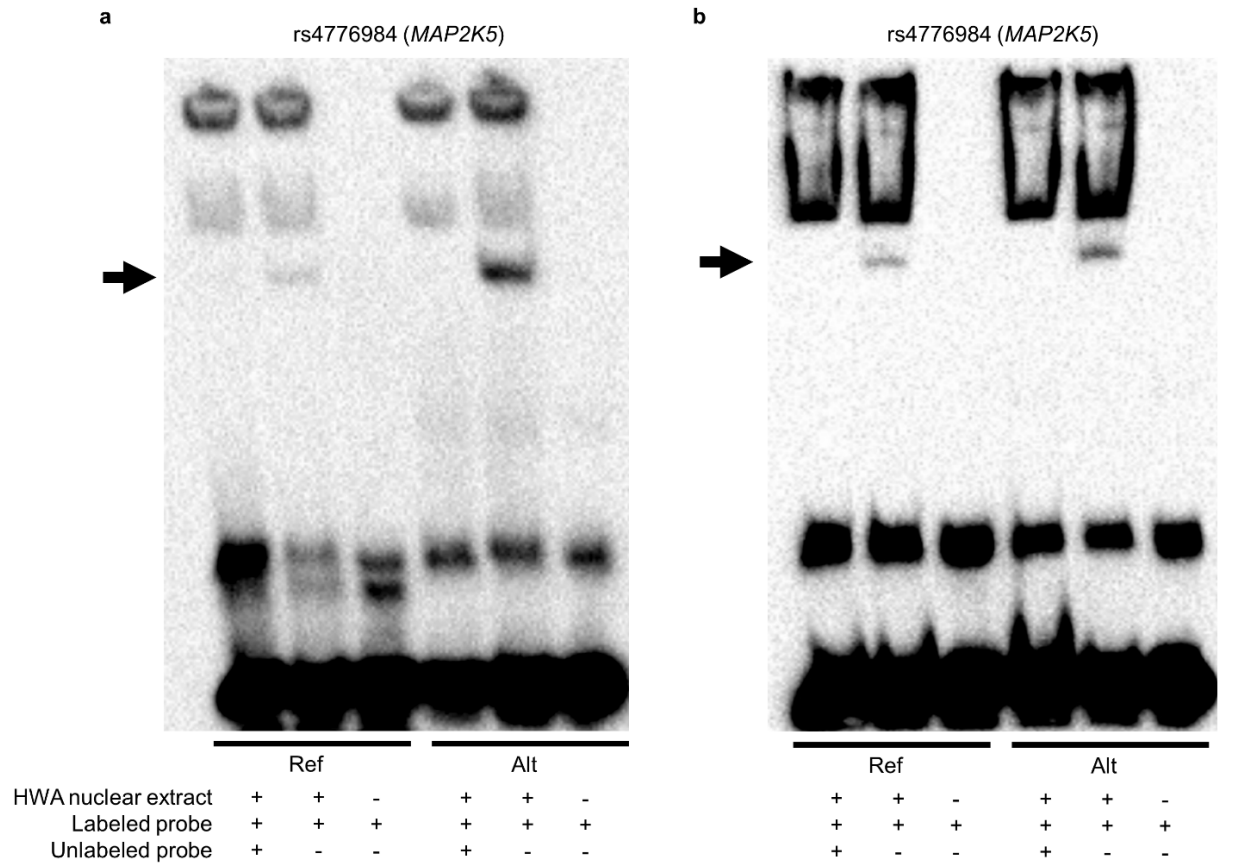

**Supplementary Figure 4. Two independent replicates for the Electrophoretic mobility shift assay (EMSA) data show increased binding of nuclear protein extracted from primary human white adipocytes (HWA) to the alternate allele when compared to the reference allele of the *MAP2K5* cis-eQTL SNP rs4776984.**

Biotinylated (labeled probe) 31-bp oligonucleotide complexes with +/-15 bp flanking the reference or alternate allele for variant rs4776984 were incubated with nuclear protein extracted from primary HWA and resolved on a 6% polyacrylamide gel. Competitor assays were performed by incubating the reaction with 100X excess of unlabeled (no biotin) oligonucleotide complexes with identical sequence. Arrow denotes specific binding of HWA nuclear protein to reference (left) and alternate (right) allele. (a) First replicate of the EMSA for rs4776984. (b) Second replicate of the EMSA for rs4776984.

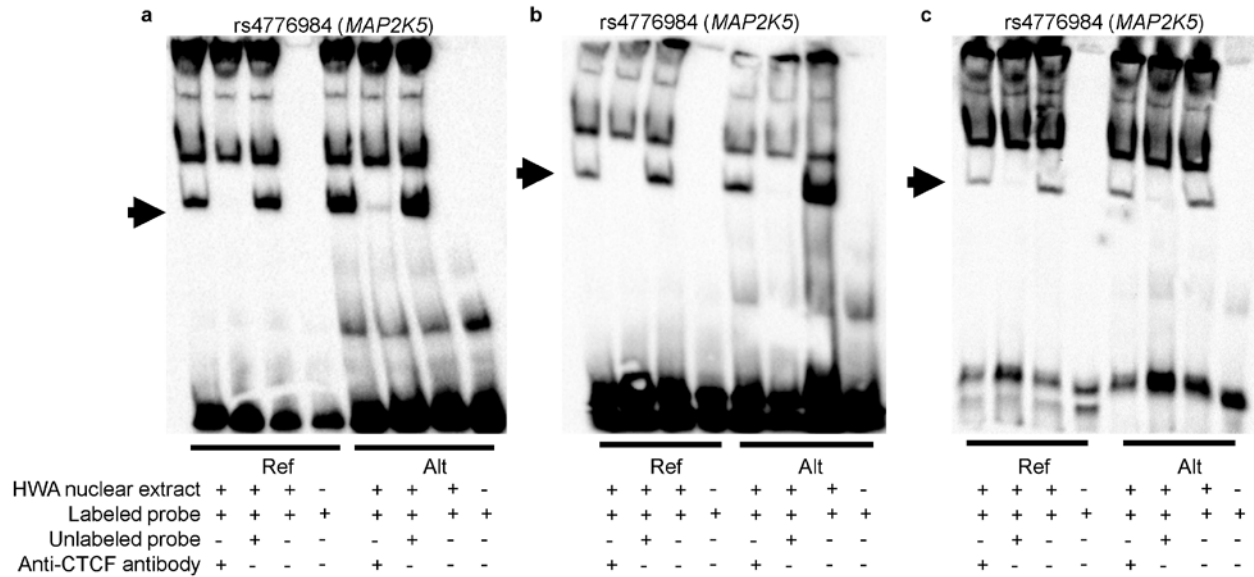

**Supplementary Figure 5. Three independent replicates for the Electrophoretic mobility shift assay (EMSA) do not show a supershift when using antibody against CTCF and nuclear protein extracted from primary human white adipocytes (HWA) at the *MAP2K5* *cis*-eQTL SNP rs4776984.**

Biotinylated (labeled probe) 31-bp oligonucleotide complexes with +/-15 bp flanking the reference or alternate allele for variant rs4776984 were incubated with nuclear protein extracted from primary HWA and resolved on a 6% polyacrylamide gel. Competitor assays were performed by incubating the reaction with 100X excess of unlabeled (no biotin) oligonucleotide complexes with identical sequence. Arrow denotes specific binding of HWA nuclear protein to reference (left) and alternate (right) allele. Supershift assays were performed with 1µg anti-CTCF antibodies (Santa Cruz sc-15914). (a) First replicate of the supershift EMSA for rs4776984. (b) Second replicate of the supershift EMSA for rs4776984. (c) Third replicate of the supershift EMSA for rs4776984.

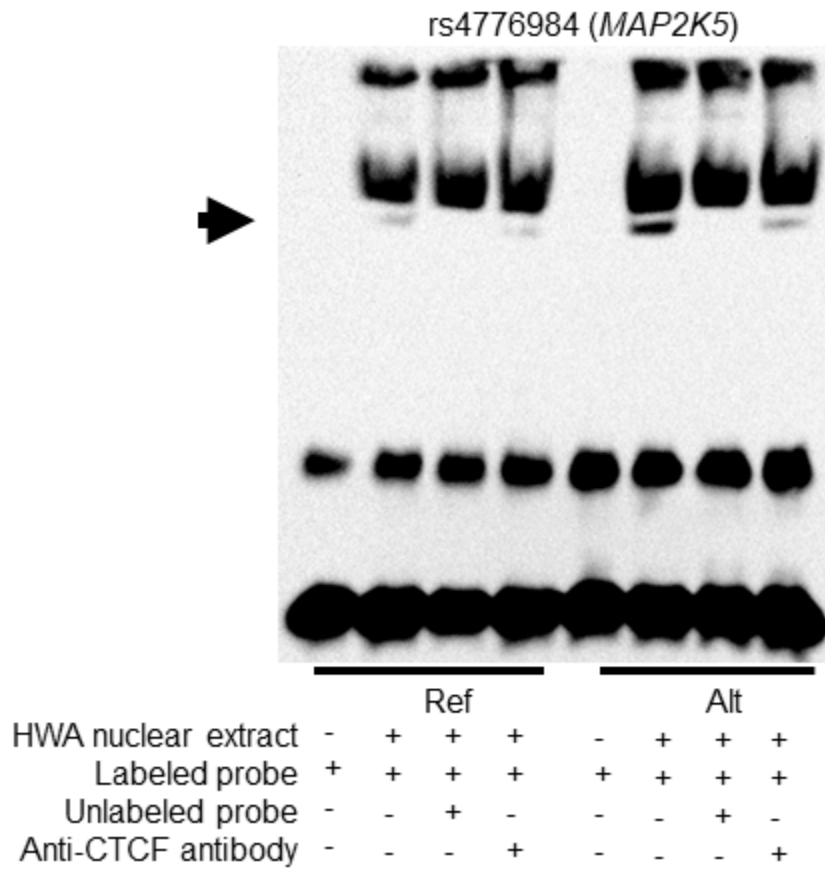

**Supplementary Figure 6. The Electrophoretic mobility shift assay (EMSA) does not show a supershift when using a different antibody against CTCF and nuclear protein extracted from primary human white adipocytes (HWA) at the *MAP2K5* cis-eQTL SNP rs4776984.**

Biotinylated (labeled probe) 31-bp oligonucleotide complexes with +/-15 bp flanking the reference or alternate allele for variant rs4776984 were incubated with nuclear protein extracted from primary HWA and resolved on a 6% polyacrylamide gel. Competitor assays were performed by incubating the reaction with 100X excess of unlabeled (no biotin) oligonucleotide complexes with identical sequence. Arrow denotes specific binding of HWA nuclear protein to reference (left) and alternate (right) allele. Supershift assays were performed with 1µg anti-CTCF antibodies (EMD Millipore 07-729).



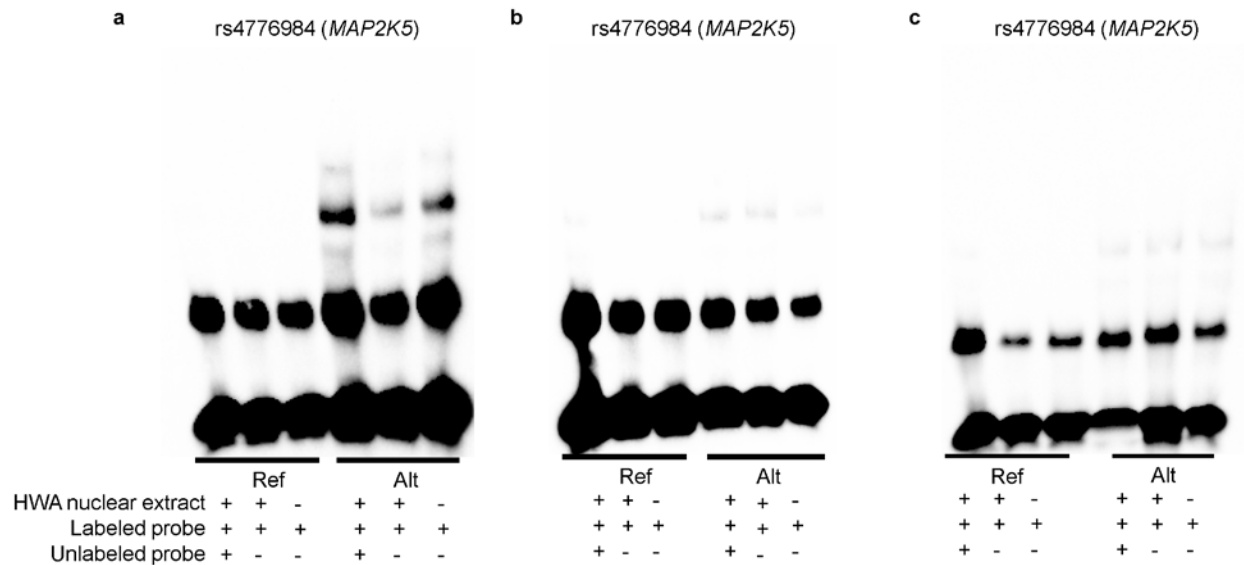

**Supplementary Figure 7. Three independent replicates for the Electrophoretic mobility shift assay (EMSA) do not show specific binding using purified CTCF protein at the *MAP2K5* cis-eQTL SNP rs4776984.**

Biotinylated (labeled probe) 31-bp oligonucleotide complexes with +/-15 bp flanking the reference or alternate allele for variant rs4776984 were incubated with purified CTCF protein (Origene TP720882) and resolved on a 6% polyacrylamide gel in our EMSA experiment.

Competitor assays were performed by incubating the reaction with 100X excess of unlabeled (no biotin) oligonucleotide complexes with identical sequence. The reference allele is on the left and alternate allele on the right. (a) First replicate of the EMSA for rs4776984. (b) Second replicate of the EMSA for rs4776984. (c) Third replicate of the EMSA for rs4776984.

**Supplementary Table 1. Parameters used for identification of novel *cis*-eQTL and looping interactions**

| <i>cis</i> -eQTL discovery                                                                                        | METSIM (n=335)                         |
|-------------------------------------------------------------------------------------------------------------------|----------------------------------------|
| Type of genetic data                                                                                              | Illumina Omni Express                  |
| # <i>cis</i> -eQTL SNPs with the same target gene and beta direction replicated in subcutaneous adipose GTEx data | 386,068                                |
| # PEER factors corrected                                                                                          | 22                                     |
| # Genetic principal components corrected                                                                          | 3                                      |
| Minor allele frequency (MAF)                                                                                      | > 5%                                   |
| Type of expression data                                                                                           | RNA-seq                                |
| Normalization technique                                                                                           | Inverse normal transformation of FPKMs |
| FDR significance threshold for <i>cis</i> -eQTL SNPs                                                              | < 5%                                   |
| # of <i>cis</i> -eQTL target genes with looping interactions                                                      | 4,332                                  |
| Promoter capture Hi-C                                                                                             | Primary human white adipocytes         |
| # reads from sequencing                                                                                           | 138,217,259                            |
| # uniquely aligned paired reads                                                                                   | 101,187,918                            |
| # valid pairs of reads after capture Hi-C specific filtering by HiCUP                                             | 88,583,089                             |
| # significant looping interaction pairs identified from CHICAGO                                                   | 80,567                                 |
| # METSIM genes in looping interaction pairs                                                                       | 10,083                                 |

**Supplementary Table 2. Histone mark enrichment in looping *Hind*III fragments in primary HWA**

| Histone mark | Base pairs of feature enrichment in looping <i>Hind</i> III fragments | Base pairs of feature enrichment in random <i>Hind</i> III fragments* | Standard deviation | <i>p</i> -value <sup>†</sup> |
|--------------|-----------------------------------------------------------------------|-----------------------------------------------------------------------|--------------------|------------------------------|
| H3K4me1      | 42181                                                                 | 39278.45                                                              | 56.94              | <2.2x10 <sup>-16</sup>       |
| H3K4me3      | 42347                                                                 | 39502.39                                                              | 55.86              | <2.2x10 <sup>-16</sup>       |
| H3K27ac      | 42095                                                                 | 39597.19                                                              | 49.24              | <2.2x10 <sup>-16</sup>       |
| H3K27me3     | 42813                                                                 | 40529.33                                                              | 43.78              | <2.2x10 <sup>-16</sup>       |
| H3K9me3      | 41222                                                                 | 39408.19                                                              | 54.07              | <2.2x10 <sup>-16</sup>       |
| DHS          | 35578                                                                 | 30547.74                                                              | 89.82              | <2.2x10 <sup>-16</sup>       |

\*Random *Hind*III fragments were controlled for distance away from the target promoter when selected.

<sup>†</sup>*p*-value computed from Pearson's chi-squared test.

Supplementary Table 3. Adipocyte chromosomal interactions are enriched for 30 transcription factors (adjusted  $p < 0.05$ ) when compared to CD34+ chromosomal interactions

| Motif logo | Motif name                                                           | $p$ -value              | Adjusted $p$ -value | Number of target sequences with motif (of 189013) | Percent of target sequences with motif | Number of background sequences with motif (of 173261) | Percent of background sequences with motif |
|------------|----------------------------------------------------------------------|-------------------------|---------------------|---------------------------------------------------|----------------------------------------|-------------------------------------------------------|--------------------------------------------|
|            | CTCF(Zf)/CD4+-CTCF-ChIP-Seq(Barski_et_al.)/Homer                     | $1.00 \times 10^{-102}$ | 0                   | 5746                                              | 3.04%                                  | 3915.7                                                | 2.26%                                      |
|            | BORIS(Zf)/K562-CTCF-ChIP-Seq(GSE32465)/Homer                         | $1.00 \times 10^{-53}$  | 0                   | 6336                                              | 3.35%                                  | 4760.1                                                | 2.75%                                      |
|            | CEBP(bZIP)/ThioMac-CEBPb-ChIP-Seq(GSE21512)/Homer                    | $1.00 \times 10^{-10}$  | 0                   | 18925                                             | 10.01%                                 | 16547.8                                               | 9.56%                                      |
|            | Sp5(Zf)/mES-Sp5.Flag-ChIP-Seq(GSE72989)/Homer                        | $1.00 \times 10^{-7}$   | 0                   | 16995                                             | 8.99%                                  | 14950.8                                               | 8.64%                                      |
|            | Elk4(ETS)/Hela-Elk4-ChIP-Seq(GSE31477)/Homer                         | $1.00 \times 10^{-5}$   | 0.00010             | 10491                                             | 5.55%                                  | 9180.3                                                | 5.31%                                      |
|            | YY1(Zf)/Promoter/Homer                                               | $1.00 \times 10^{-5}$   | 0.00030             | 817                                               | 0.43%                                  | 638.7                                                 | 0.37%                                      |
|            | NRF1(NRF)/MCF7-NRF1-ChIP-Seq(Unpublished)/Homer                      | $1.00 \times 10^{-5}$   | 0.00040             | 1163                                              | 0.61%                                  | 935.2                                                 | 0.54%                                      |
|            | TEAD2(TEA)/Py2T-Tea2-ChIP-Seq(GSE55709)/Homer                        | $1.00 \times 10^{-4}$   | 0.00050             | 12965                                             | 6.86%                                  | 11440.4                                               | 6.61%                                      |
|            | E2F3(E2F)/MEF-E2F3-ChIP-Seq(GSE71376)/Homer                          | $1.00 \times 10^{-4}$   | 0.00070             | 7993                                              | 4.23%                                  | 6986.6                                                | 4.04%                                      |
|            | Erra(NR)/HepG2-Erra-ChIP-Seq(GSE31477)/Homer                         | $1.00 \times 10^{-4}$   | 0.0023              | 40662                                             | 21.50%                                 | 36580.6                                               | 21.14%                                     |
|            | TEAD(TEA)/Fibroblast-PU.1-ChIP-Seq(Unpublished)/Homer                | $1.00 \times 10^{-4}$   | 0.0026              | 17798                                             | 9.41%                                  | 15848.7                                               | 9.16%                                      |
|            | Elk1(ETS)/Hela-Elk1-ChIP-Seq(GSE31477)/Homer                         | $1.00 \times 10^{-4}$   | 0.0026              | 10671                                             | 5.64%                                  | 9422.4                                                | 5.45%                                      |
|            | TEAD4(TEA)/Tropoblast-Tea4-ChIP-Seq(GSE37350)/Homer                  | $1.00 \times 10^{-4}$   | 0.0026              | 20464                                             | 10.82%                                 | 18265.1                                               | 10.56%                                     |
|            | GFY(?)/Promoter/Homer                                                | $1.00 \times 10^{-3}$   | 0.0031              | 1159                                              | 0.61%                                  | 950.2                                                 | 0.55%                                      |
|            | E2F4(E2F)/K562-E2F4-ChIP-Seq(GSE31477)/Homer                         | $1.00 \times 10^{-3}$   | 0.0069              | 5131                                              | 2.71%                                  | 4475.5                                                | 2.59%                                      |
|            | Sp1(Zf)/Promoter/Homer                                               | $1.00 \times 10^{-3}$   | 0.0084              | 3622                                              | 1.92%                                  | 3133.5                                                | 1.81%                                      |
|            | NFY(CCAAT)/Promoter/Homer                                            | $1.00 \times 10^{-3}$   | 0.0084              | 14237                                             | 7.53%                                  | 12676.1                                               | 7.33%                                      |
|            | Ronin(THAP)/ES-Thap11-ChIP-Seq(GSE51522)/Homer                       | $1.00 \times 10^{-3}$   | 0.012               | 443                                               | 0.23%                                  | 346.4                                                 | 0.20%                                      |
|            | Olig2(bHLH)/Neuron-Olig2-ChIP-Seq(GSE30882)/Homer                    | $1.00 \times 10^{-3}$   | 0.014               | 45873                                             | 24.26%                                 | 41429.3                                               | 23.94%                                     |
|            | E2F6(E2F)/Hela-E2F6-ChIP-Seq(GSE31477)/Homer                         | $1.00 \times 10^{-2}$   | 0.022               | 7047                                              | 3.73%                                  | 6221.3                                                | 3.60%                                      |
|            | ZNF143 STAF(Zf)/CUTLL-ZNF143-ChIP-Seq(GSE29600)/Homer                | $1.00 \times 10^{-2}$   | 0.024               | 5580                                              | 2.95%                                  | 4906.1                                                | 2.84%                                      |
|            | DUX4(Homeobox)/Myoblasts-DUX4.V5-ChIP-Seq(GSE75791)/Homer            | $1.00 \times 10^{-2}$   | 0.029               | 936                                               | 0.49%                                  | 777.7                                                 | 0.45%                                      |
|            | NRF(NRF)/Promoter/Homer                                              | $1.00 \times 10^{-2}$   | 0.036               | 1622                                              | 0.86%                                  | 1382.4                                                | 0.80%                                      |
|            | PPARE(NR),DR1/3T3L1-Pparg-ChIP-Seq(GSE13511)/Homer                   | $1.00 \times 10^{-2}$   | 0.039               | 17385                                             | 9.19%                                  | 15586.6                                               | 9.01%                                      |
|            | Pax7(Paired,Homeobox),longest/Myoblast-Pax7-ChIP-Seq(GSE25064)/Homer | $1.00 \times 10^{-2}$   | 0.040               | 513                                               | 0.27%                                  | 415                                                   | 0.24%                                      |
|            | NFAT(RHD)/Jurkat-NFATC1-ChIP-Seq(Jolma_et_al.)/Homer                 | $1.00 \times 10^{-2}$   | 0.045               | 20039                                             | 10.60%                                 | 18002.5                                               | 10.40%                                     |

Supplementary Table 4. LD score enrichments, heritability estimates, and p-values using the published LD Score software<sup>9</sup>

| Category                            | Prop. of SNPs | Prop. of h <sup>2</sup> | Enrichment | SE  | p-value                |
|-------------------------------------|---------------|-------------------------|------------|-----|------------------------|
| Coding_UCSC                         | 0.02          | 0.15                    | 9.26       | 0.9 | 6.66x10 <sup>-23</sup> |
| Coding_UCSC.extend.500              | 0.07          | 0.28                    | 4.21       | 0.3 | 1.27x10 <sup>-27</sup> |
| Conserved_LindbladToh               | 0.03          | 0.15                    | 5.32       | 0.8 | 1.26x10 <sup>-8</sup>  |
| Conserved_LindbladToh.extend.500    | 0.34          | 0.56                    | 1.64       | 0.1 | 4.45x10 <sup>-7</sup>  |
| CTCF_Hoffman                        | 0.02          | 0.06                    | 2.52       | 0.5 | 4.92x10 <sup>-3</sup>  |
| CTCF_Hoffman.extend.500             | 0.07          | 0.11                    | 1.58       | 0.3 | 2.59x10 <sup>-2</sup>  |
| DGF_ENCODE                          | 0.14          | 0.34                    | 2.46       | 0.2 | 6.87x10 <sup>-10</sup> |
| DGF_ENCODE.extend.500               | 0.54          | 0.77                    | 1.42       | 0.1 | 2.60x10 <sup>-5</sup>  |
| DHS_peaks_Trynka                    | 0.11          | 0.27                    | 2.37       | 0.3 | 3.92x10 <sup>-6</sup>  |
| DHS_Trynka                          | 0.17          | 0.35                    | 2.05       | 0.2 | 8.32x10 <sup>-6</sup>  |
| DHS_Trynka.extend.500               | 0.50          | 0.72                    | 1.44       | 0.1 | 3.56x10 <sup>-5</sup>  |
| Enhancer_Andersson                  | 0.00          | 0.01                    | 2.60       | 2.0 | 4.30x10 <sup>-1</sup>  |
| Enhancer_Andersson.extend.500       | 0.02          | 0.03                    | 1.70       | 0.7 | 2.87x10 <sup>-1</sup>  |
| Enhancer_Hoffman                    | 0.06          | 0.15                    | 2.27       | 0.3 | 6.34x10 <sup>-5</sup>  |
| Enhancer_Hoffman.extend.500         | 0.16          | 0.30                    | 1.93       | 0.2 | 2.51x10 <sup>-7</sup>  |
| FetalDHS_Trynka                     | 0.09          | 0.28                    | 3.25       | 0.3 | 3.78x10 <sup>-12</sup> |
| FetalDHS_Trynka.extend.500          | 0.29          | 0.48                    | 1.69       | 0.2 | 2.28x10 <sup>-8</sup>  |
| H3K27ac_Hnisz                       | 0.39          | 0.65                    | 1.64       | 0.1 | 2.77x10 <sup>-8</sup>  |
| H3K27ac_Hnisz.extend.500            | 0.43          | 0.68                    | 1.58       | 0.1 | 9.46x10 <sup>-8</sup>  |
| H3K27ac_PGC2                        | 0.27          | 0.53                    | 1.95       | 0.1 | 2.57x10 <sup>-11</sup> |
| H3K27ac_PGC2.extend.500             | 0.34          | 0.61                    | 1.80       | 0.1 | 8.44x10 <sup>-1</sup>  |
| H3K4me1_peaks_Trynka                | 0.18          | 0.35                    | 1.98       | 0.2 | 2.26x10 <sup>-6</sup>  |
| H3K4me1_Trynka                      | 0.43          | 0.71                    | 1.64       | 0.1 | 5.61x10 <sup>-8</sup>  |
| H3K4me1_Trynka.extend.500           | 0.61          | 0.86                    | 1.41       | 0.1 | 6.55x10 <sup>-6</sup>  |
| H3K4me3_peaks_Trynka                | 0.04          | 0.11                    | 2.55       | 0.6 | 1.35x10 <sup>-3</sup>  |
| H3K4me3_Trynka                      | 0.14          | 0.35                    | 2.59       | 0.2 | 5.48x10 <sup>-13</sup> |
| H3K4me3_Trynka.extend.500           | 0.26          | 0.49                    | 1.88       | 0.1 | 4.52x10 <sup>-10</sup> |
| H3K9ac_peaks_Trynka                 | 0.04          | 0.12                    | 3.03       | 0.5 | 1.03x10 <sup>-5</sup>  |
| H3K9ac_Trynka                       | 0.13          | 0.36                    | 2.79       | 0.2 | 1.07x10 <sup>-14</sup> |
| H3K9ac_Trynka.extend.500            | 0.23          | 0.50                    | 2.15       | 0.2 | 1.18x10 <sup>-14</sup> |
| Intron_UCSC                         | 0.39          | 0.40                    | 1.00       | 0.1 | 9.63x10 <sup>-1</sup>  |
| Intron_UCSC.extend.500              | 0.40          | 0.51                    | 1.27       | 0.1 | 3.63x10 <sup>-3</sup>  |
| PromoterFlanking_Hoffman            | 0.01          | 0.04                    | 4.43       | 1.1 | 1.82x10 <sup>-3</sup>  |
| PromoterFlanking_Hoffman.extend.500 | 0.03          | 0.13                    | 3.70       | 0.4 | 3.39x10 <sup>-12</sup> |
| Promoter_UCSC                       | 0.03          | 0.14                    | 4.45       | 0.5 | 6.18x10 <sup>-12</sup> |
| Promoter_UCSC.extend.500            | 0.04          | 0.18                    | 4.51       | 0.4 | 1.01x10 <sup>-20</sup> |
| Repressed_Hoffman                   | 0.45          | 0.30                    | 0.65       | 0.1 | 5.99x10 <sup>-20</sup> |
| Repressed_Hoffman.extend.500        | 0.71          | 0.47                    | 0.65       | 0.1 | 8.43x10 <sup>-6</sup>  |
| SuperEnhancer_Hnisz                 | 0.17          | 0.35                    | 2.03       | 0.2 | 1.79x10 <sup>-6</sup>  |
| SuperEnhancer_Hnisz.extend.500      | 0.17          | 0.34                    | 1.97       | 0.2 | 1.57x10 <sup>-6</sup>  |
| TFBS_ENCODE                         | 0.13          | 0.34                    | 2.50       | 0.2 | 2.61x10 <sup>-11</sup> |
| TFBS_ENCODE.extend.500              | 0.35          | 0.49                    | 1.42       | 0.1 | 6.98x10 <sup>-4</sup>  |
| Transcribed_Hoffman                 | 0.35          | 0.38                    | 1.07       | 0.1 | 5.34x10 <sup>-1</sup>  |
| Transcribed_Hoffman.extend.500      | 0.77          | 0.74                    | 0.97       | 0.1 | 6.53x10 <sup>-1</sup>  |
| TSS_Hoffman                         | 0.02          | 0.13                    | 7.10       | 0.9 | 5.15x10 <sup>-12</sup> |
| TSS_Hoffman.extend.500              | 0.04          | 0.19                    | 5.23       | 0.5 | 6.73x10 <sup>-15</sup> |
| UTR_3_UCSC                          | 0.01          | 0.08                    | 6.88       | 0.9 | 4.11x10 <sup>-10</sup> |
| UTR_3_UCSC.extend.500               | 0.03          | 0.13                    | 4.48       | 0.6 | 4.99x10 <sup>-10</sup> |
| UTR_5_UCSC                          | 0.01          | 0.05                    | 9.46       | 1.8 | 1.36x10 <sup>-6</sup>  |
| UTR_5_UCSC.extend.500               | 0.03          | 0.15                    | 5.10       | 0.5 | 1.19x10 <sup>-14</sup> |
| WeakEnhancer_Hoffman                | 0.02          | 0.04                    | 1.92       | 0.6 | 1.02x10 <sup>-1</sup>  |
| WeakEnhancer_Hoffman.extend.500     | 0.09          | 0.17                    | 1.92       | 0.2 | 1.58x10 <sup>-4</sup>  |

**Supplementary Table 5. LD score enrichments, heritability estimates, and p-values after modification of the LD score software**

| Category                            | Prop. of SNPs | Prop. of $h^2$ | Enrichment | SE  | p-value                |
|-------------------------------------|---------------|----------------|------------|-----|------------------------|
| Coding_UCSC                         | 0.03          | 0.20           | 6.64       | 0.6 | $3.44 \times 10^{-22}$ |
| Coding_UCSC.extend.500              | 0.12          | 0.39           | 3.19       | 0.2 | $5.65 \times 10^{-27}$ |
| Conserved_LindbladToh               | 0.03          | 0.16           | 4.82       | 0.5 | $3.25 \times 10^{-13}$ |
| Conserved_LindbladToh.extend.500    | 0.40          | 0.63           | 1.59       | 0.1 | $3.09 \times 10^{-10}$ |
| CTCF_Hoffman                        | 0.03          | 0.07           | 2.18       | 0.4 | $1.54 \times 10^{-3}$  |
| CTCF_Hoffman.extend.500             | 0.10          | 0.14           | 1.47       | 0.2 | $7.92 \times 10^{-3}$  |
| DGF_ENCODE                          | 0.18          | 0.40           | 2.19       | 0.2 | $3.73 \times 10^{-12}$ |
| DGF_ENCODE.extend.500               | 0.64          | 0.83           | 1.29       | 0.1 | $1.23 \times 10^{-4}$  |
| DHS_peaks_Trynka                    | 0.14          | 0.31           | 2.32       | 0.2 | $2.94 \times 10^{-9}$  |
| DHS_Trynka                          | 0.20          | 0.40           | 1.99       | 0.2 | $7.84 \times 10^{-9}$  |
| DHS_Trynka.extend.500               | 0.56          | 0.76           | 1.34       | 0.1 | $2.98 \times 10^{-5}$  |
| Enhancer_Andersson                  | 0.01          | 0.01           | 2.21       | 1.4 | $3.80 \times 10^{-1}$  |
| Enhancer_Andersson.extend.500       | 0.03          | 0.04           | 1.48       | 0.5 | $2.89 \times 10^{-1}$  |
| Enhancer_Hoffman                    | 0.10          | 0.19           | 1.95       | 0.2 | $2.96 \times 10^{-5}$  |
| Enhancer_Hoffman.extend.500         | 0.23          | 0.38           | 1.66       | 0.1 | $5.12 \times 10^{-7}$  |
| FetalDHS_Trynka                     | 0.11          | 0.31           | 2.92       | 0.2 | $4.30 \times 10^{-15}$ |
| FetalDHS_Trynka.extend.500          | 0.34          | 0.53           | 1.58       | 0.1 | $1.68 \times 10^{-7}$  |
| H3K27ac_Hnisz                       | 0.54          | 0.75           | 1.39       | 0.1 | $7.15 \times 10^{-6}$  |
| H3K27ac_Hnisz.extend.500            | 0.57          | 0.77           | 1.35       | 0.1 | $2.25 \times 10^{-5}$  |
| H3K27ac_PGC2                        | 0.37          | 0.62           | 1.67       | 0.1 | $7.02 \times 10^{-10}$ |
| H3K27ac_PGC2.extend.500             | 0.46          | 0.71           | 1.54       | 0.1 | $6.89 \times 10^{-9}$  |
| H3K4me1_peaks_Trynka                | 0.24          | 0.41           | 1.74       | 0.2 | $4.82 \times 10^{-7}$  |
| H3K4me1_Trynka                      | 0.55          | 0.80           | 1.44       | 0.1 | $9.82 \times 10^{-7}$  |
| H3K4me1_Trynka.extend.500           | 0.74          | 0.92           | 1.25       | 0.1 | $3.15 \times 10^{-4}$  |
| H3K4me3_peaks_Trynka                | 0.06          | 0.15           | 2.36       | 0.3 | $6.40 \times 10^{-5}$  |
| H3K4me3_Trynka                      | 0.20          | 0.46           | 2.29       | 0.2 | $4.79 \times 10^{-15}$ |
| H3K4me3_Trynka.extend.500           | 0.35          | 0.60           | 1.71       | 0.1 | $2.44 \times 10^{-11}$ |
| H3K9ac_peaks_Trynka                 | 0.07          | 0.17           | 2.50       | 0.3 | $2.10 \times 10^{-6}$  |
| H3K9ac_Trynka                       | 0.21          | 0.48           | 2.30       | 0.2 | $5.70 \times 10^{-15}$ |
| H3K9ac_Trynka.extend.500            | 0.36          | 0.64           | 1.77       | 0.1 | $4.00 \times 10^{-13}$ |
| Intron_UCSC                         | 0.47          | 0.43           | 0.91       | 0.1 | $2.60 \times 10^{-1}$  |
| Intron_UCSC.extend.500              | 0.49          | 0.60           | 1.21       | 0.1 | $4.05 \times 10^{-3}$  |
| PromoterFlanking_Hoffman            | 0.01          | 0.04           | 3.30       | 0.8 | $2.11 \times 10^{-3}$  |
| PromoterFlanking_Hoffman.extend.500 | 0.05          | 0.15           | 2.91       | 0.3 | $3.11 \times 10^{-12}$ |
| Promoter_UCSC                       | 0.06          | 0.20           | 3.41       | 0.4 | $2.98 \times 10^{-12}$ |
| Promoter_UCSC.extend.500            | 0.07          | 0.25           | 3.43       | 0.3 | $2.08 \times 10^{-20}$ |
| Repressed_Hoffman                   | 0.34          | 0.18           | 0.55       | 0.1 | $2.20 \times 10^{-7}$  |
| Repressed_Hoffman.extend.500        | 0.56          | 0.32           | 0.57       | 0.1 | $1.10 \times 10^{-15}$ |
| SuperEnhancer_Hnisz                 | 0.27          | 0.43           | 1.63       | 0.2 | $1.92 \times 10^{-5}$  |
| SuperEnhancer_Hnisz.extend.500      | 0.27          | 0.43           | 1.59       | 0.1 | $2.07 \times 10^{-5}$  |
| TFBS_ENCODE                         | 0.18          | 0.41           | 2.26       | 0.2 | $2.21 \times 10^{-15}$ |
| TFBS_ENCODE.extend.500              | 0.43          | 0.60           | 1.38       | 0.1 | $7.13 \times 10^{-5}$  |
| Transcribed_Hoffman                 | 0.43          | 0.43           | 1.02       | 0.1 | $7.98 \times 10^{-1}$  |
| Transcribed_Hoffman.extend.500      | 0.76          | 0.72           | 0.94       | 0.1 | $3.15 \times 10^{-1}$  |
| TSS_Hoffman                         | 0.03          | 0.19           | 5.34       | 0.6 | $9.97 \times 10^{-13}$ |
| TSS_Hoffman.extend.500              | 0.06          | 0.26           | 3.97       | 0.4 | $1.84 \times 10^{-15}$ |
| UTR_3_UCSC                          | 0.02          | 0.10           | 5.06       | 0.6 | $2.30 \times 10^{-10}$ |
| UTR_3_UCSC.extend.500               | 0.05          | 0.16           | 3.41       | 0.4 | $2.80 \times 10^{-10}$ |
| UTR_5_UCSC                          | 0.01          | 0.07           | 7.15       | 1.2 | $2.72 \times 10^{-7}$  |
| UTR_5_UCSC.extend.500               | 0.05          | 0.20           | 3.99       | 0.4 | $4.37 \times 10^{-16}$ |
| WeakEnhancer_Hoffman                | 0.03          | 0.05           | 1.67       | 0.4 | $7.95 \times 10^{-2}$  |
| WeakEnhancer_Hoffman.extend.500     | 0.13          | 0.22           | 1.62       | 0.2 | $3.10 \times 10^{-4}$  |

**Supplementary Table 6. Fifty-four eGenes in METSIM, including the 42 genes replicated for correlation with BMI and effect direction in TwinsUK**

| Gene                       | Chr <sup>#</sup> | Pearson             |                        | Linear regression   |       |                        |                 |                 |                        |
|----------------------------|------------------|---------------------|------------------------|---------------------|-------|------------------------|-----------------|-----------------|------------------------|
|                            |                  | METSIM <sup>†</sup> | METSIM <sup>*</sup>    | METSIM <sup>†</sup> | SE    | METSIM <sup>*</sup>    | Effect size (β) | SE              | TwinsUK <sup>§</sup>   |
|                            |                  | Effect size (r)     | p-value                | Effect size (β)     | SE    | p-value                | Effect size (β) | SE              | p-value                |
| <i>ADH1B</i>               | 4                | -0.45               | 7.40x10 <sup>-18</sup> | -0.21               | 0.02  | 1.68x10 <sup>-20</sup> | -0.58           | 0.03            | 4.47x10 <sup>-71</sup> |
| <i>ORMDL3</i> <sup>*</sup> | 17               | -0.45               | 8.57x10 <sup>-18</sup> | -0.16               | 0.02  | 2.06x10 <sup>-20</sup> | -0.58           | 0.03            | 2.65x10 <sup>-70</sup> |
| <i>AKR1C3</i>              | 10               | 0.33                | 4.78x10 <sup>-10</sup> | 0.13                | 0.02  | 2.95x10 <sup>-11</sup> | 0.49            | 0.03            | 5.19x10 <sup>-54</sup> |
| <i>CMTM3</i>               | 16               | 0.41                | 4.32x10 <sup>-15</sup> | 0.087               | 0.01  | 3.84x10 <sup>-17</sup> | 0.50            | 0.03            | 6.64x10 <sup>-52</sup> |
| <i>LPIN1</i>               | 2                | -0.38               | 1.49x10 <sup>-13</sup> | -0.14               | 0.02  | 2.27x10 <sup>-15</sup> | -0.47           | 0.03            | 2.38x10 <sup>-44</sup> |
| <i>RNF157</i>              | 17               | -0.29               | 5.19x10 <sup>-8</sup>  | -0.096              | 0.02  | 5.87x10 <sup>-9</sup>  | -0.47           | 0.03            | 8.86x10 <sup>-42</sup> |
| <i>MYOF</i>                | 10               | 0.32                | 1.07x10 <sup>-9</sup>  | 0.086               | 0.01  | 7.37x10 <sup>-11</sup> | 0.46            | 0.03            | 2.59x10 <sup>-40</sup> |
| <i>NAA40</i>               | 11               | 0.28                | 1.81x10 <sup>-7</sup>  | 0.052               | 0.009 | 2.67x10 <sup>-8</sup>  | 0.46            | 0.03            | 4.00x10 <sup>-40</sup> |
| <i>TMEM165</i>             | 4                | 0.33                | 2.45x10 <sup>-9</sup>  | 0.045               | 0.007 | 1.84x10 <sup>-10</sup> | 0.45            | 0.03            | 3.52x10 <sup>-37</sup> |
| <i>RFFL</i>                | 11               | 0.27                | 1.02x10 <sup>-6</sup>  | 0.035               | 0.006 | 1.84x10 <sup>-8</sup>  | 0.43            | 0.03            | 5.67x10 <sup>-37</sup> |
| <i>TMC06</i>               | 5                | -0.28               | 9.23x10 <sup>-8</sup>  | -0.060              | 0.01  | 1.18x10 <sup>-8</sup>  | -0.44           | 0.03            | 5.04x10 <sup>-35</sup> |
| <i>SCRN2</i>               | 17               | -0.38               | 2.23x10 <sup>-13</sup> | -0.10               | 0.01  | 3.79x10 <sup>-15</sup> | -0.38           | 0.03            | 5.32x10 <sup>-35</sup> |
| <i>CSGALNACT1</i>          | 8                | 0.24                | 1.00x10 <sup>-5</sup>  | 0.047               | 0.01  | 2.04x10 <sup>-6</sup>  | 0.42            | 0.03            | 1.41x10 <sup>-31</sup> |
| <i>TAPBP</i>               | 6                | 0.25                | 6.71x10 <sup>-6</sup>  | 0.047               | 0.02  | 1.60x10 <sup>-6</sup>  | 0.32            | 0.03            | 1.52x10 <sup>-29</sup> |
| <i>CLN8</i>                | 8                | 0.32                | 4.50x10 <sup>-9</sup>  | 0.044               | 0.007 | 3.67x10 <sup>-10</sup> | 0.36            | 0.03            | 4.41x10 <sup>-29</sup> |
| <i>DRAM1</i>               | 12               | 0.30                | 1.87x10 <sup>-8</sup>  | 0.050               | 0.008 | 1.80x10 <sup>-9</sup>  | 0.40            | 0.03            | 5.94x10 <sup>-29</sup> |
| <i>WNT2B</i>               | 1                | 0.25                | 2.44x10 <sup>-6</sup>  | 0.026               | 0.005 | 4.90x10 <sup>-7</sup>  | 0.38            | 0.03            | 1.41x10 <sup>-27</sup> |
| <i>S100A1</i>              | 1                | -0.27               | 2.52x10 <sup>-7</sup>  | -0.20               | 0.04  | 3.59x10 <sup>-8</sup>  | -0.38           | 0.03            | 3.69x10 <sup>-26</sup> |
| <i>RPS6KL1</i>             | 14               | 0.26                | 2.54x10 <sup>-6</sup>  | 0.060               | 0.01  | 5.25x10 <sup>-7</sup>  | 0.34            | 0.03            | 3.27x10 <sup>-25</sup> |
| <i>SLC16A7</i>             | 12               | -0.26               | 3.47x10 <sup>-6</sup>  | -0.068              | 0.01  | 7.60x10 <sup>-7</sup>  | -0.30           | 0.03            | 2.08x10 <sup>-23</sup> |
| <i>ZNF592</i>              | 15               | -0.27               | 8.26x10 <sup>-7</sup>  | -0.037              | 0.007 | 1.40x10 <sup>-7</sup>  | -0.33           | 0.03            | 2.10x10 <sup>-23</sup> |
| <i>MFSD1</i>               | 3                | 0.31                | 8.31x10 <sup>-9</sup>  | 0.069               | 0.01  | 6.70x10 <sup>-10</sup> | 0.35            | 0.04            | 2.82x10 <sup>-22</sup> |
| <i>HYI</i>                 | 1                | -0.31               | 6.45x10 <sup>-9</sup>  | -0.11               | 0.02  | 5.52x10 <sup>-10</sup> | -0.29           | 0.03            | 5.95x10 <sup>-22</sup> |
| <i>ANXA4</i>               | 2                | 0.24                | 1.04x10 <sup>-5</sup>  | 0.045               | 0.009 | 2.52x10 <sup>-6</sup>  | 0.35            | 0.04            | 1.20x10 <sup>-21</sup> |
| <i>RAB30</i>               | 11               | 0.24                | 8.19x10 <sup>-6</sup>  | 0.040               | 0.008 | 1.98x10 <sup>-6</sup>  | 0.31            | 0.03            | 1.16x10 <sup>-20</sup> |
| <i>PLD1</i>                | 3                | -0.28               | 2.26x10 <sup>-7</sup>  | -0.050              | 0.009 | 3.24x10 <sup>-8</sup>  | -0.32           | 0.03            | 7.95x10 <sup>-20</sup> |
| <i>MYO5A</i>               | 15               | 0.30                | 3.20x10 <sup>-8</sup>  | 0.049               | 0.008 | 3.41x10 <sup>-9</sup>  | 0.32            | 0.04            | 4.61x10 <sup>-19</sup> |
| <i>ACADS</i> <sup>*</sup>  | 12               | -0.37               | 2.91x10 <sup>-12</sup> | -0.085              | 0.01  | 7.12x10 <sup>-14</sup> | -0.24           | 0.03            | 6.65x10 <sup>-19</sup> |
| <i>SCAI</i>                | 9                | -0.28               | 1.81x10 <sup>-7</sup>  | -0.034              | 0.006 | 2.50x10 <sup>-8</sup>  | -0.27           | 0.03            | 1.42x10 <sup>-18</sup> |
| <i>HLA-DRB1</i>            | 6                | 0.25                | 3.53x10 <sup>-6</sup>  | 0.14                | 0.03  | 7.83x10 <sup>-7</sup>  | 0.31            | 0.03            | 2.09x10 <sup>-18</sup> |
| <i>LACTB</i> <sup>*</sup>  | 15               | 0.30                | 1.67x10 <sup>-8</sup>  | 0.069               | 0.01  | 1.40x10 <sup>-9</sup>  | 0.32            | 0.04            | 4.94x10 <sup>-18</sup> |
| <i>GPHN</i>                | 14               | -0.43               | 7.51x10 <sup>-17</sup> | -0.11               | 0.01  | 3.20x10 <sup>-19</sup> | -0.29           | 0.03            | 4.28x10 <sup>-17</sup> |
| <i>MPHOSPH8</i>            | 13               | -0.24               | 8.25x10 <sup>-6</sup>  | -0.033              | 0.007 | 2.02x10 <sup>-6</sup>  | -0.23           | 0.04            | 3.97x10 <sup>-11</sup> |
| <i>MAP2K5</i> <sup>*</sup> | 15               | -0.25               | 7.83x10 <sup>-6</sup>  | -0.039              | 0.008 | 1.90x10 <sup>-6</sup>  | -0.21           | 0.03            | 3.81x10 <sup>-10</sup> |
| <i>RRNAD1</i>              | 1                | -0.24               | 1.05x10 <sup>-5</sup>  | -0.032              | 0.007 | 2.30x10 <sup>-6</sup>  | -0.19           | 0.03            | 3.14x10 <sup>-9</sup>  |
| <i>CCDC50</i>              | 3                | -0.33               | 1.16x10 <sup>-9</sup>  | -0.059              | 0.009 | 7.24x10 <sup>-11</sup> | -0.18           | 0.03            | 9.93x10 <sup>-9</sup>  |
| <i>RAD54L2</i>             | 3                | -0.25               | 2.32x10 <sup>-6</sup>  | -0.030              | 0.006 | 4.70x10 <sup>-7</sup>  | -0.20           | 0.04            | 2.78x10 <sup>-8</sup>  |
| <i>SCMH1</i>               | 1                | -0.32               | 1.11x10 <sup>-9</sup>  | -0.047              | 0.007 | 7.55x10 <sup>-11</sup> | -0.19           | 0.03            | 3.85x10 <sup>-8</sup>  |
| <i>ATP7B</i>               | 13               | -0.26               | 6.30x10 <sup>-7</sup>  | -0.040              | 0.007 | 1.11x10 <sup>-7</sup>  | -0.20           | 0.04            | 7.22x10 <sup>-8</sup>  |
| <i>CYP7B1</i>              | 8                | 0.24                | 6.90x10 <sup>-6</sup>  | 0.047               | 0.01  | 1.64x10 <sup>-6</sup>  | 0.19            | 0.03            | 1.07x10 <sup>-7</sup>  |
| <i>RERE</i>                | 1                | -0.24               | 1.02x10 <sup>-5</sup>  | -0.031              | 0.006 | 2.61x10 <sup>-6</sup>  | -0.17           | 0.04            | 5.39x10 <sup>-6</sup>  |
| <i>RPAP1</i>               | 15               | -0.35               | 1.86x10 <sup>-10</sup> | -0.042              | 0.006 | 8.82x10 <sup>-12</sup> | -0.14           | 0.03            | 9.58x10 <sup>-6</sup>  |
| <i>ARHGEF7</i>             | 13               | -0.35               | 4.12x10 <sup>-11</sup> | -0.050              | 0.007 | 1.60x10 <sup>-12</sup> | 0.022           | 0.04            | NS <sup>  </sup>       |
| <i>NCKIPSD</i>             | 3                | -0.34               | 3.28x10 <sup>-10</sup> | -0.067              | 0.01  | 1.51x10 <sup>-11</sup> | -0.042          | 0.03            | NS <sup>  </sup>       |
| <i>NDUFS2</i>              | 1                | -0.24               | 9.38x10 <sup>-6</sup>  | -0.029              | 0.006 | 2.17x10 <sup>-6</sup>  | -0.048          | 0.03            | NS <sup>  </sup>       |
| <i>REEP1</i>               | 2                | -0.24               | 6.38x10 <sup>-6</sup>  | -0.033              | 0.007 | 1.45x10 <sup>-6</sup>  | 0.022           | 0.04            | NS <sup>  </sup>       |
| <i>RGCC</i>                | 13               | -0.25               | 2.81x10 <sup>-6</sup>  | -0.076              | 0.01  | 4.91x10 <sup>-7</sup>  | 0.087           | 0.03            | NS <sup>  </sup>       |
| <i>SETD6</i>               | 16               | -0.27               | 3.99x10 <sup>-7</sup>  | -0.041              | 0.007 | 6.30x10 <sup>-8</sup>  | -0.047          | 0.04            | NS <sup>  </sup>       |
| <i>SLC35A3</i>             | 12               | -0.26               | 1.13x10 <sup>-6</sup>  | -0.024              | 0.004 | 2.15x10 <sup>-7</sup>  | 0.043           | 0.03            | NS <sup>  </sup>       |
| <i>SPAG7</i>               | 17               | -0.26               | 1.21x10 <sup>-6</sup>  | -0.035              | 0.007 | 2.27x10 <sup>-7</sup>  | -0.076          | 0.03            | NS <sup>  </sup>       |
| <i>NUDCD3</i>              | 7                | -0.34               | 7.00x10 <sup>-10</sup> | -0.032              | 0.005 | 4.17x10 <sup>-11</sup> | NA <sup>¶</sup> | NA <sup>¶</sup> | NA <sup>¶</sup>        |
| <i>RP11-387H17.4</i>       | 17               | -0.40               | 4.40x10 <sup>-14</sup> | -0.26               | 0.03  | 4.74x10 <sup>-16</sup> | NA <sup>¶</sup> | NA <sup>¶</sup> | NA <sup>¶</sup>        |
| <i>RSBN1L-AS1</i>          | 7                | -0.36               | 1.65x10 <sup>-11</sup> | -0.056              | 0.007 | 5.73x10 <sup>-13</sup> | NA <sup>¶</sup> | NA <sup>¶</sup> | NA <sup>¶</sup>        |
| <i>TUBB2B</i>              | 6                | 0.34                | 1.01x10 <sup>-10</sup> | 0.14                | 0.02  | 4.51x10 <sup>-12</sup> | NA <sup>¶</sup> | NA <sup>¶</sup> | NA <sup>¶</sup>        |

<sup>†</sup>GWAS gene.

<sup>†</sup>Effect size (r, Pearson rho) and p-value calculated from Pearson correlation between gene expression and BMI (see Methods).

<sup>\*</sup>Effect size, standard error (SE), and p-value calculated using a linear regression model with BMI and age, age<sup>2</sup> and the 14 technical factors as covariates when compared to a null model without BMI. These models were compared using an F-test (see Methods).

<sup>§</sup>Effect size, standard error (SE), and p-value calculated from linear mixed effects model. A full model including BMI was compared to a null model in which the same model was fitted, but with the phenotype (BMI) omitted. These models were compared using an F-test (see Methods).

<sup>||</sup>Adjusted p-value > 9.26x10<sup>-4</sup>.

<sup>¶</sup>Value not applicable due to inability to test for replication in TwinsUK cohort.

<sup>#</sup>Chr indicates chromosome.

**Supplementary Table 7. The 42 replicated BMI-correlated eGenes show significant enrichment for metabolic and inflammatory pathways using KEGG pathway analysis as implemented in WebGestalt<sup>13</sup>**

| KEGG Pathway Name                            | Ratio of Enrichment | Number of Genes | Genes in Pathway                | <i>p</i> -value | Adjusted <i>p</i> -value* |
|----------------------------------------------|---------------------|-----------------|---------------------------------|-----------------|---------------------------|
| Fatty acid metabolism                        | 18.76               | 2               | <i>ACADS</i><br><i>ADH1B</i>    | 0.0051          | 0.010                     |
| Metabolism of xenobiotics by cytochrome P450 | 21.78               | 2               | <i>AKR1C3</i><br><i>ADH1B</i>   | 0.0038          | 0.010                     |
| Steroid hormone biosynthesis                 | 30.69               | 2               | <i>AKR1C3</i><br><i>CYP7B1</i>  | 0.0019          | 0.010                     |
| Antigen processing and presentation          | 11.85               | 2               | <i>HLA-DRB1</i><br><i>TAPBP</i> | 0.012           | 0.019                     |

\**p*-value adjusted using Benjamini-Hochberg correction for multiple testing.



**Supplementary Table 8. DeepSEA analysis of the variants in the MAP2K5 locus supports the functionality of the looping *cis*-eQTL SNP rs4776984.**

| SNP ID     | Chr   | Position | Ref | Alt | DeepSEA score         |
|------------|-------|----------|-----|-----|-----------------------|
| rs4776984  | chr15 | 68118194 | A   | C   | $2.36 \times 10^{-3}$ |
| rs4776982  | chr15 | 68114974 | A   | G   | $3.90 \times 10^{-2}$ |
| rs4492996  | chr15 | 68113240 | A   | G   | $7.16 \times 10^{-2}$ |
| rs4776990  | chr15 | 68137364 | C   | T   | $1.09 \times 10^{-1}$ |
| rs28742003 | chr15 | 68127769 | C   | T   | $1.30 \times 10^{-1}$ |
| rs28427879 | chr15 | 68124256 | G   | T   | $1.98 \times 10^{-1}$ |

**Supplementary Table 9. Significant CHiCAGO interaction and replication scores from a separate HWA Capture Hi-C experiment verify the looping *cis*-eQTLs for the four identified obesity-related loci.**

| Other End                 | Baited Fragment           | Target Gene | Looping <i>cis</i> -eQTL | CHiCAGO score | Replication score |
|---------------------------|---------------------------|-------------|--------------------------|---------------|-------------------|
| chr15,67834655,67840760   | chr15,68111739,68138337   | MAP2K5      | rs4476984                | 5.05          | 6.15              |
| chr17,38082534,38106859   | chr17,38074576,38081958   | ORMDL3      | rs8076131                | 6.35          | 6.73              |
| chr15,63413071,63415370   | chr15,63561331,63570763   | LACTB       | rs3784671                | 6.65          | 13.92             |
| chr12,121158545,121162946 | chr12,121343847,121345146 | ACADS       | rs10774569               | 5.29          | 6.62              |

**Supplementary Table 10. DNA oligonucleotides used for electrophoretic mobility shift assay.**

| DNA oligonucleotides                                | Sequence (5' -> 3') for positive and negative strand |
|-----------------------------------------------------|------------------------------------------------------|
| Reference allele – A (positive) biotinylated probe* | GCGCGCCCAACTCGGAGCGCCCTGCTGGGCG                      |
| Reference allele – A (negative) biotinylated probe  | CGCCAGCAGGGCGCTCCGAGTTGGGCGCGC                       |
| Alternate allele – C (positive) biotinylated probe* | GCGCGCCCAACTCGGCGCGCCCTGCTGGGCG                      |
| Alternate allele – C (negative) biotinylated probe  | CGCCAGCAGGGCGCGCCGAGTTGGGCGCGC                       |

\*Biotinylated probes were created by adding biotin to the 5' end of positive strand probes.
